# Supplementary material for: Shear Stress and Sub-Femtomolar Levels of Ligand Synergize to Activate ALK1 Signaling in Endothelial Cells
Source: MDPI journal article supplement (doi:10.3390/cells13030285), 2024-02-05
Supplement: s1 [file s1]

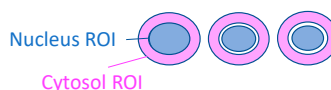

**Supplementary Figure S1 (Supports Figure 1B). Validation of cytosolic region of interest (ROI) used to calculate ALK signaling index (ASI).** Confluent HUVECs were serum starved for 4 hours in 0.2% BSA medium, treated for 45 minutes with 0 or 1 pg/mL BMP10, then fixed and stained for nucleus (DAPI) and pSMAD1/5/9. To calculate the ASI, the cytosolic ROI was drawn 0, 3, or 5 pixels (0, 1.3, or 2.2  $\mu\text{m}$ ) away from nuclear ROI, and resulting ASIs compared by one-way ANOVA with Tukey multiple comparisons test. ns = not significant. N = 3 independent experiments. Each dot represents 1 EC.

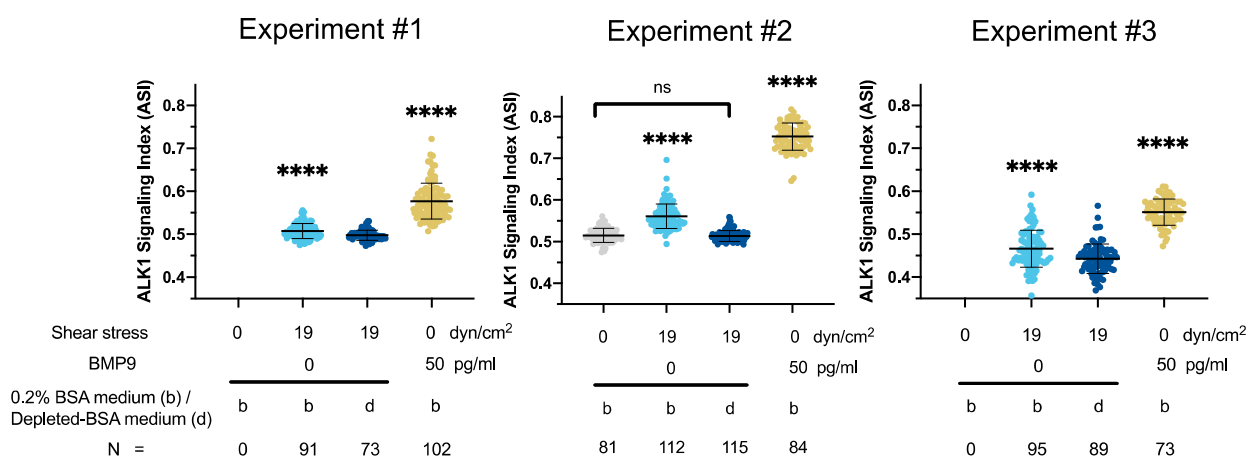

**Supplementary Figure S2 (Supports Figure 3B). The effect of pSMAD1/5/9 localization between the ALK1-Fc depleted BSA medium and normal BSA medium.** In all three trials, statistically significant differences are observed in pSMAD1/5/9 localization between the ALK1-Fc depleted BSA medium and normal BSA medium.

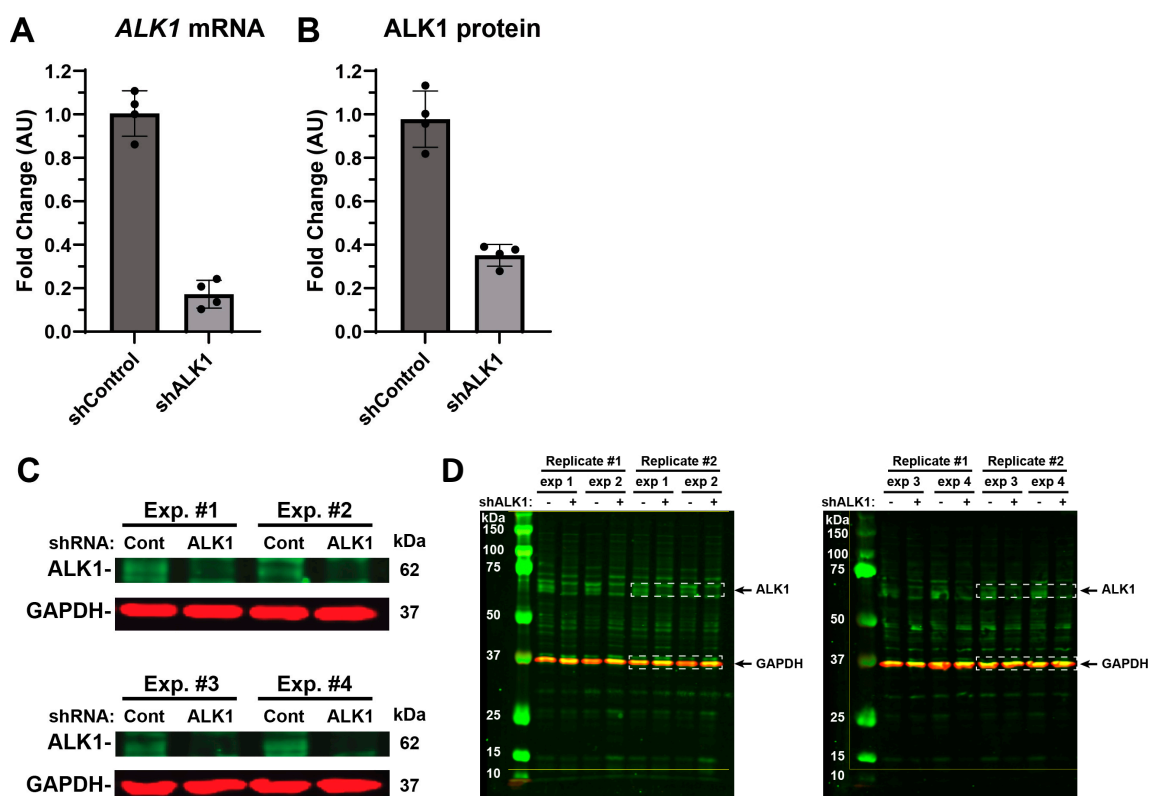

**Supplementary Figure S3 (Supports Figure 4B). Knockdown efficiency of ALK1 in HUVECs.** HUVECs were transduced with lentivirus carrying control or ALK1-targeted shRNA and analyzed at 6-days post-transduction for *ALK1* mRNA by RT-qPCR (A) and ALK1 protein by western blot, normalized to GAPDH (B,C). N = 3 independent experiments, with duplicate wells (as in C) averaged for each N.

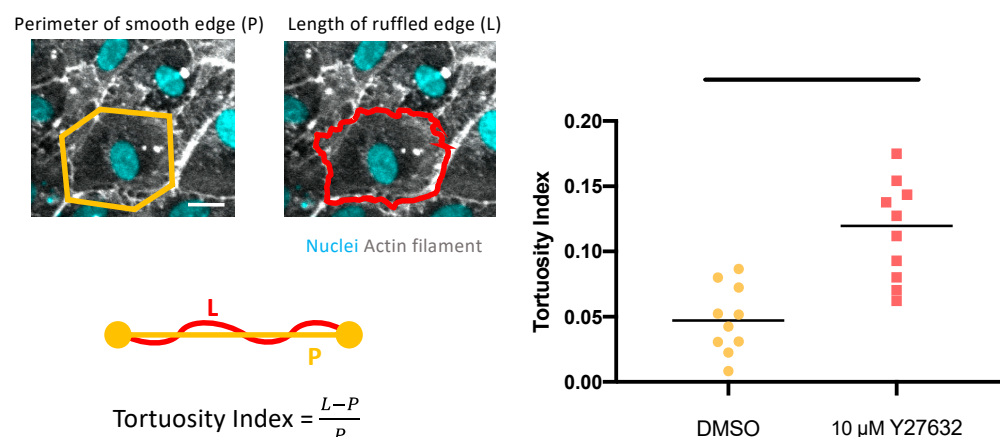

**Supplementary Figure S4 (Supports Figure 5B). Y27632 enhances tortuosity of cell-cell junctions.** Confluent HUVECs treated for 1 hour 45 minutes with 0.1% DMSO or 10 μM Y27632 in 0.1% DMSO. Nuclei were labeled with DAPI and the F-actin cytoskeleton was labeled with phalloidin, and the tortuosity index was calculated as indicated. N = 3 independent experiments. Each dot represents 1 EC. Two-tailed unpaired student's t-test. \*\*\* p = 0.0002. Scale bar = 20 μm.

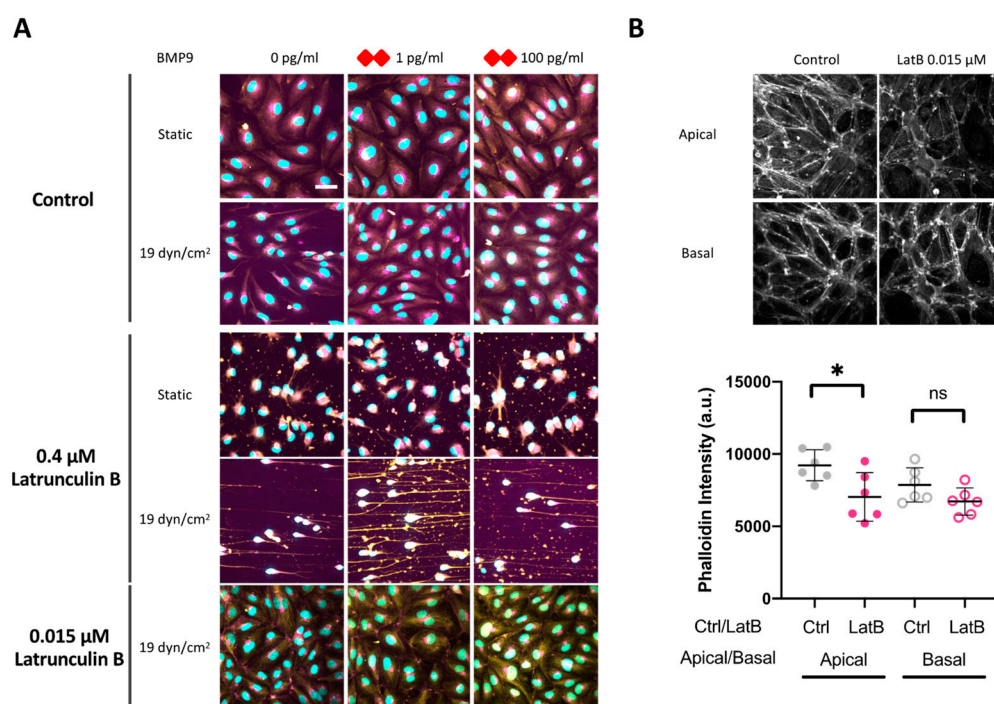

**Supplementary Figure S5 (Supports Figure 5C). HUVECs treated with 0.015 μM Latrunculin B maintain normal EC morphology under shear stress.** (A) Confluent HUVECs were grown in static conditions or under SS (19 dyn/cm²) and treated with “standard” (0.4 μM) or low (0.015 μM) concentration of latrunculin B, or 0.4% DMSO for 75 minutes. Fixed cells were stained for the nucleus (cyan), pSMAD1/5/9 (yellow), and the Golgi (magenta). (B) Apical actin filament level was decreased with 0.015 μM Latrunculin B treatment, while basal actin remained unchanged under static condition. (stained by Acti-stain 670 phalloidin). Two-tailed unpaired student's t-test, \* p = 0.0228. Scale bar = 40 μm.

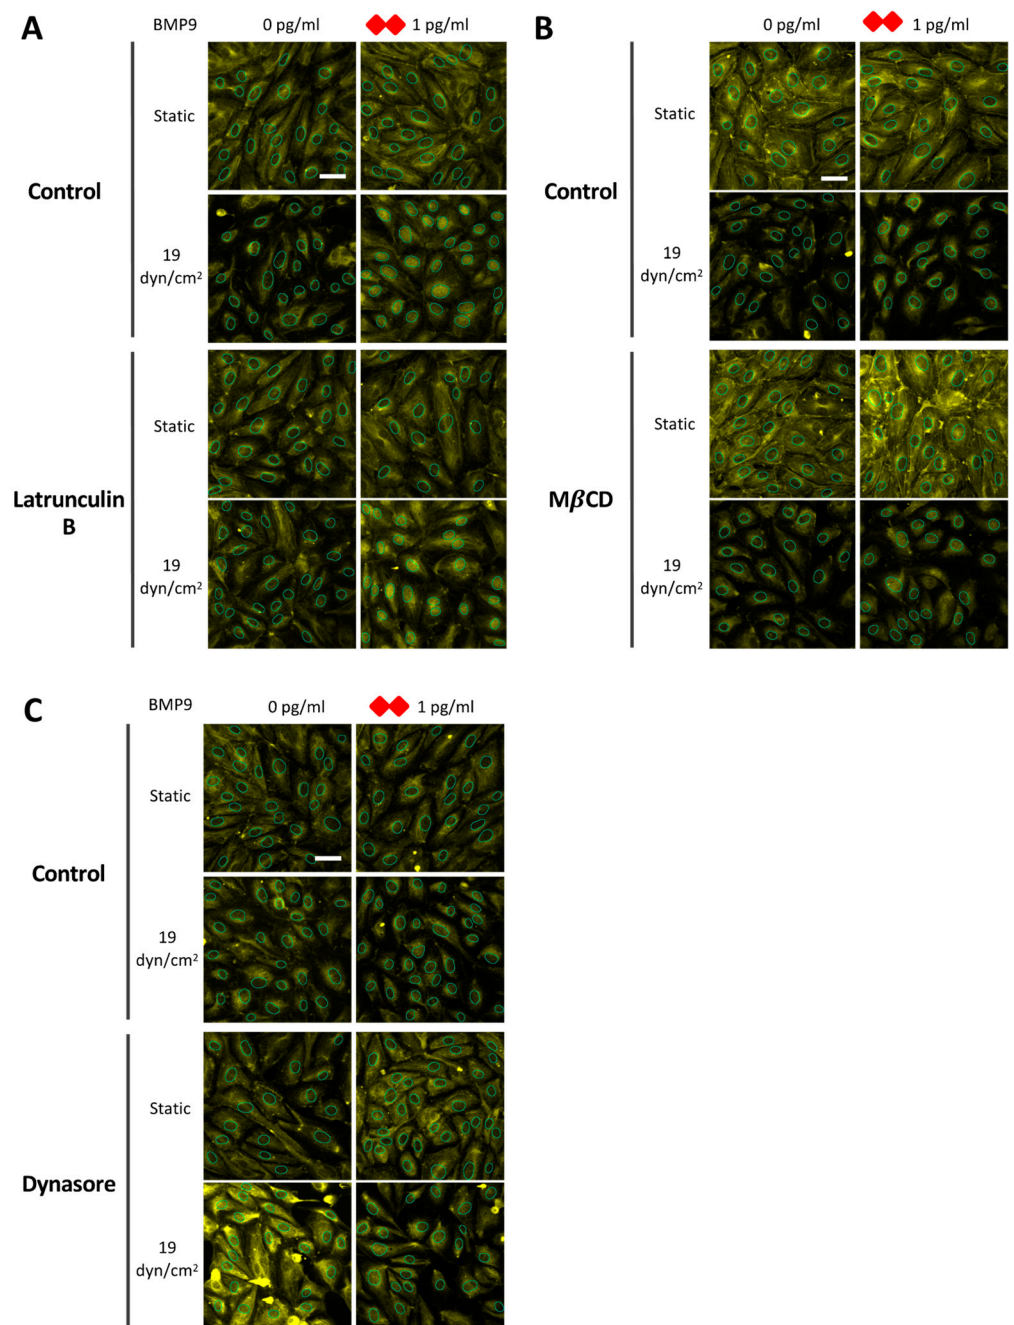

**Supplementary Figure S6 (Supports Figures 5C, 5D, and 5E).** Nuclear outlines (cyan) and the localization of pSMAD1/5/9 (yellow) in HUVECs treated with latrunculin B (A), MβCD (B) and Dynasore (C). The outlines of nuclei were segmented from the DAPI fluorescence. Scale bar = 40 μm.

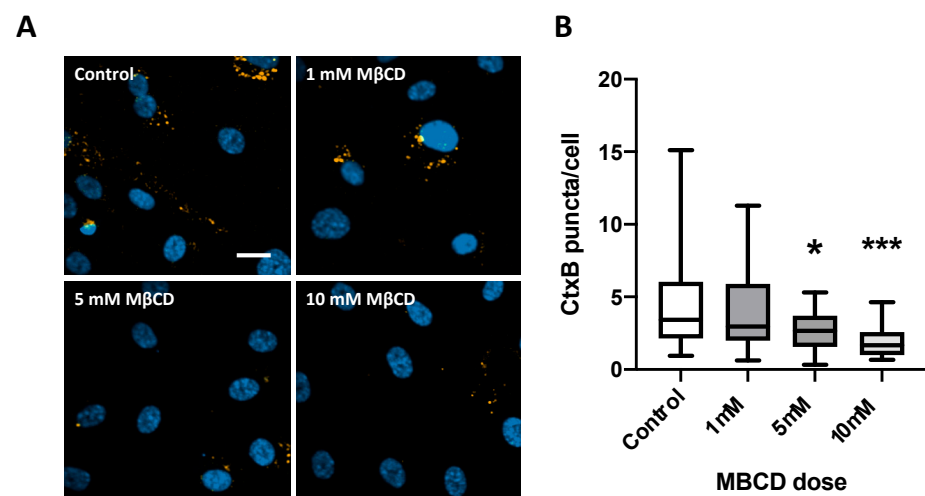

**Supplementary Figure S7 (Supports Figure 5D). MβCD disrupts cholesterol-enriched microdomains.** HUVECs were treated for 75 minutes with indicated concentrations of MβCD. Fixed cells were stain for nuclei (DAPI) and Cholera toxin subunit B (CtxB), and CtxB puncta counted in 4 fields and N > 250 cells per condition over 3 independent experiments. One-way ANOVA and Tukey post-hoc test, \*p = 0.0217; \*\*\*p = 0.0005. Scale bar = 20 μm.

**Supplementary Table S1 (Supports Figure 5). Phospho-SMAD1/5/9 mean intensities and standard deviation (SD) under static or flow condition.**

| BMP9 Conc. (pg/ml) | Treatment     | Shear Stress (dyn/cm <sup>2</sup> ) | Mean  | SD    |
|--------------------|---------------|-------------------------------------|-------|-------|
| 0                  | Confluent     | 0                                   | 0.466 | 0.026 |
|                    |               | 19                                  | 0.489 | 0.041 |
|                    | Sub-confluent | 0                                   | 0.458 | 0.032 |
|                    |               | 19                                  | 0.534 | 0.036 |
| 1                  | Confluent     | 0                                   | 0.465 | 0.027 |
|                    |               | 19                                  | 0.571 | 0.051 |
|                    | Sub-confluent | 0                                   | 0.463 | 0.027 |
|                    |               | 19                                  | 0.567 | 0.046 |
| 0                  | -             | 0                                   | 0.509 | 0.014 |
|                    |               | 19                                  | 0.572 | 0.045 |
|                    | Y27632        | 0                                   | 0.510 | 0.010 |
|                    |               | 19                                  | 0.572 | 0.046 |
| 1                  | -             | 0                                   | 0.514 | 0.016 |
|                    |               | 19                                  | 0.742 | 0.062 |
|                    | Y27632        | 0                                   | 0.531 | 0.036 |
|                    |               | 19                                  | 0.752 | 0.063 |
| 0                  | -             | 0                                   | 0.451 | 0.030 |
|                    |               | 19                                  | 0.474 | 0.045 |
|                    | Latrunculin B | 0                                   | 0.451 | 0.032 |
|                    |               | 19                                  | 0.496 | 0.035 |
| 1                  | -             | 0                                   | 0.451 | 0.033 |
|                    |               | 19                                  | 0.603 | 0.046 |
|                    | Latrunculin B | 0                                   | 0.456 | 0.029 |
|                    |               | 19                                  | 0.607 | 0.040 |
| 0                  | -             | 0.425                               | 0.028 | 0.425 |
|                    |               | 0.454                               | 0.040 | 0.454 |
|                    | MβCD          | 0.441                               | 0.035 | 0.441 |
|                    |               | 0.452                               | 0.033 | 0.452 |
| 1                  | -             | 0.430                               | 0.027 | 0.430 |
|                    |               | 0.469                               | 0.051 | 0.469 |
|                    | MβCD          | 0.431                               | 0.030 | 0.431 |
|                    |               | 0.505                               | 0.049 | 0.505 |
| 0                  | -             | 0                                   | 0.446 | 0.031 |
|                    |               | 19                                  | 0.479 | 0.034 |
|                    | Dynasore      | 0                                   | 0.435 | 0.029 |
|                    |               | 19                                  | 0.461 | 0.034 |
| 1                  | -             | 0                                   | 0.452 | 0.029 |
|                    |               | 19                                  | 0.561 | 0.069 |
|                    | Dynasore      | 0                                   | 0.438 | 0.027 |
|                    |               | 19                                  | 0.552 | 0.059 |
